# Supplementary material for: The novel compound dimethylamine-5,5′-bistetrazole-1,1′-diolate: crystal structure, thermal investigation, safety evaluation and theoretical studies
Source: Royal Society of Chemistry journal article supplement (doi:10.1039/c7ra00908a), 2017-01-01
Supplement: c7ra00908a1.pdf [file c7ra00908a1.pdf]

## The novel compound Dimethylamine-5,5'-bistetrazole-1,1'-diolate: Crystal structure, Thermal investigation, Safety evaluation and Theoretical studies

Yuehai Yu,<sup>a</sup> Shusen Chen,<sup>a</sup> Xin Li,<sup>a</sup> Shaohua Jin,<sup>a</sup> Lijie Li,<sup>a</sup> Guangyuan Zhang,<sup>b</sup> Xiao Ma,<sup>b</sup> and Qinghai Shu,<sup>a,\*</sup>

|                                                                                                                                 |          |
|---------------------------------------------------------------------------------------------------------------------------------|----------|
| <b>Figure</b> .....                                                                                                             | <b>2</b> |
| Fig. S1 The crystal structure of BTO (CCDC: 1532257) .....                                                                      | 2        |
| Fig.S2 Activation energy as a function of reaction progress of DMA-BTO by Friedman method of ATKs .....                         | 2        |
| Fig.S3 $\ln\beta$ versus $1/T$ for the decomposition of DMA-BTO by ASTM E698 method of AKTS.....                                | 2        |
| <b>Table</b> .....                                                                                                              | <b>3</b> |
| Table S1 crystal structure data for DMA-BTO and BTO.....                                                                        | 3        |
| Table S2 Atomic coordinates of BTO.....                                                                                         | 3        |
| Table S3 Selected bond lengths (Å), angles (deg), and torsion angles (deg) for DMA-BTO .....                                    | 4        |
| Table S4 Atomic coordinates of DMA-BTO .....                                                                                    | 4        |
| Table S5 DTA Parameters of DMA-BTO.....                                                                                         | 4        |
| Table S6 Activation energy and pre-exponential factor evaluation by Kissinger method for thermal decomposition of DMA-BTO ..... | 4        |
| Table S7 Activation energy and pre-exponential factor evaluation by Ozawa method for thermal decomposition of DMA-BTO .....     | 5        |
| Table S8 Calculated thermo-kinetic parameters of DMA-BTO by AKTS.....                                                           | 5        |
| Table S9 The SADT of DMA-BTO by AKTS.....                                                                                       | 5        |
| Table S10 Second-order perturbation theory analysis of the Fock matrix in NBO basis for DMA-BTO .....                           | 5        |
| Table S11 Mulliken charge population of atoms in DMA-BTO.....                                                                   | 6        |

## Figures

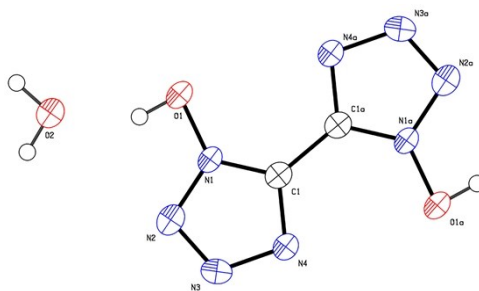

**Fig. S1** The crystal structure of BTO (CCDC: 1532257)

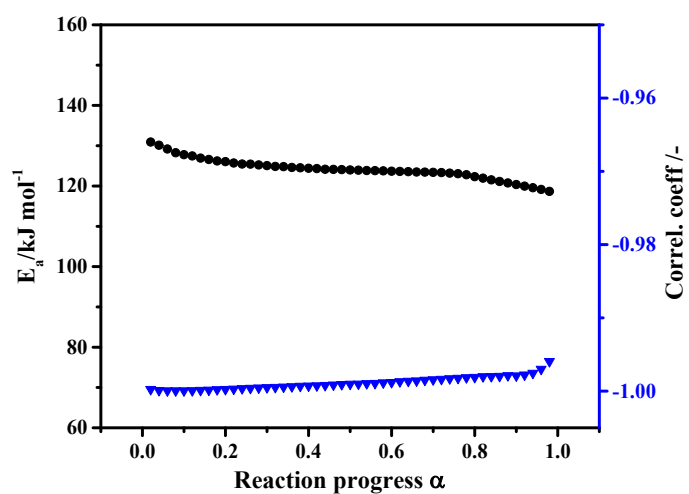

**Fig.S2** Activation energy as a function of reaction progress of DMA-BTO by Friedman method of ATKS

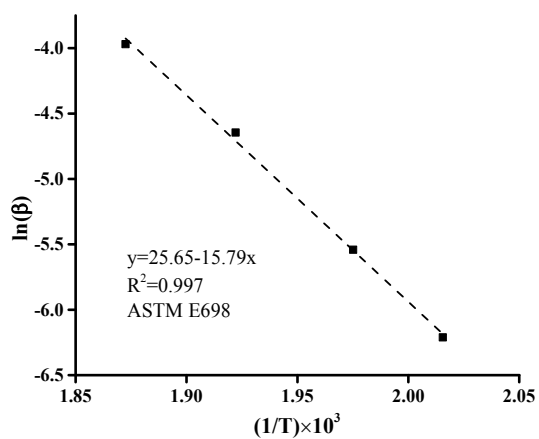

**Fig.S3**  $\ln\beta$  versus  $1/T$  for the decomposition of DMA-BTO by ASTM E698 method of AKTS

## Tables

**Table S1** crystal structure data for DMA-BTO and BTO

| Formula                                         | C <sub>6</sub> H <sub>16</sub> N <sub>10</sub> O <sub>2</sub> | C <sub>2</sub> H <sub>6</sub> N <sub>8</sub> O <sub>4</sub> |
|-------------------------------------------------|---------------------------------------------------------------|-------------------------------------------------------------|
| M <sub>r</sub> (g mol <sup>-1</sup> )           | 260.29                                                        | 206.15                                                      |
| Crystal size(mm <sup>3</sup> )                  | 0.65× 0.10×0.03                                               | 0.22× 0.20×0.18                                             |
| Crystal group                                   | Triclinic                                                     | Monoclinic                                                  |
| Space group                                     | P-1                                                           | C2/m                                                        |
| a(Å)                                            | 5.571                                                         | 7.752                                                       |
| b(Å)                                            | 7.293                                                         | 6.391                                                       |
| c(Å)                                            | 8.500                                                         | 8.702                                                       |
| α(deg)                                          | 109.868                                                       | 90.00                                                       |
| β(deg)                                          | 102.043                                                       | 116.05                                                      |
| γ(deg)                                          | 101.239                                                       | 90.00                                                       |
| V(Å <sup>3</sup> )                              | 304.1                                                         | 387.3                                                       |
| Z                                               | 1                                                             | 2                                                           |
| D <sub>calcd</sub> (g cm <sup>-3</sup> )        | 1.421                                                         | 1.768                                                       |
| μ(MoKα)(cm <sup>-1</sup> )                      | 1.12                                                          | 1.62                                                        |
| F(000)(e)                                       | 138                                                           | 212                                                         |
| hkl range                                       | ±7, -8→9, ±11                                                 | -9→6, -6→7, -9→10                                           |
| ((sinθ)/λ) <sub>max</sub> (Å <sup>-1</sup> )    | 0.661                                                         | 0.971                                                       |
| Refl. Measured/unique/R <sub>int</sub>          | 3565/1437/0.0499                                              | 995/0.0388/0.0375                                           |
| Parameter refined                               | 85                                                            | 49                                                          |
| R(F)/wR(F <sup>2</sup> ) (all reflexions)       | 0.1224/0.3422                                                 | 0.1036/0.3191                                               |
| GoF (F <sup>2</sup> ) <sup>c</sup>              | 1.003                                                         | 1.505                                                       |
| Δρ <sub>fin</sub> (max/min)(e Å <sup>-3</sup> ) | 0.660/-0.472                                                  | 0.558/-0.605                                                |
| CCDC                                            | 1447137                                                       | 1532257                                                     |

**Table S2** Atomic coordinates of BTO

| Ato  | Site | x           | y | z         | Atom  | Site | x         | y | z        |
|------|------|-------------|---|-----------|-------|------|-----------|---|----------|
| C(1) | m    | -0.0206(10) | 0 | 0.4103(8) | H(10) | m    | 0.295(16) | 0 | 0.333(7) |
| N(1) | m    | 0.1038(8)   | 0 | 0.3467(7) | H(1W) | m    | 0.356(18) | 0 | 0.110(3) |
| N(2) | m    | 0.013(1)    | 0 | 0.1753(8) | H(2W) | m    | 0.532(8)  | 0 | 0.23(2)  |
| N(3) | m    | -0.1667(10) | 0 | 0.1380(7) |       |      |           |   |          |
| N(4) | m    | -0.1979(8)  | 0 | 0.2809(6) |       |      |           |   |          |
| O(1) | m    | 0.2951(7)   | 0 | 0.4303(7) |       |      |           |   |          |
| O(2) | m    | 0.4180(8)   | 0 | 0.2177(6) |       |      |           |   |          |

**Table S3** Selected bond lengths (Å), angles (deg), and torsion angles (deg) for DMA-BTO

| Parameters        | Experimental value | Parameters           | Experimental value |
|-------------------|--------------------|----------------------|--------------------|
| Bond lengths (Å)  |                    | Bond angles (deg)    |                    |
| O(1)-N(1)         | 1.322(6)           | C(3)-N(5)-C(2)       | 113.4(5)           |
| N(1)-C(1)         | 1.345(7)           | N(4)-C(1)-N(1)       | 108.9(4)           |
| N(1)-N(2)         | 1.363(7)           | N(4)-C(1)-C(1)       | 127.7(6)           |
| N(2)-N(3)         | 1.308(7)           | N(1)-C(1)-C(1)       | 123.4(6)           |
| N(3)-N(4)         | 1.336(7)           | Torsion angles (deg) |                    |
| N(4)-C(1)         | 1.344(7)           | O(1)-N(1)-N(2)-N(3)  | 178.7(5)           |
| N(5)-C(3)         | 1.470(8)           | C(1)-N(1)-N(2)-N(3)  | 0.6(6)             |
| N(5)-C(2)         | 1.483(8)           | N(1)-N(2)-N(3)-N(4)  | -0.4(7)            |
| C(1)-C(1)         | 1.469(10)          | N(2)-N(3)-N(4)-C(1)  | 0.0(7)             |
| Bond angles (deg) |                    | N(3)-N(4)-C(1)-N(1)  | 0.4(6)             |
| O(1)-N(1)-C(1)    | 129.6(5)           | N(3)-N(4)-C(1)-C(1)  | 179.9(7)           |
| O(1)-N(1)-N(2)    | 122.6(4)           | O(1)-N(1)-C(1)-N(4)  | -178.5(5)          |
| C(1)-N(1)-N(2)    | 107.8(4)           | N(2)-N(1)-C(1)-N(4)  | -0.6(6)            |
| N(3)-N(2)-N(1)    | 105.7(4)           | O(1)-N(1)-C(1)-C(1)  | 2.0(10)            |
| N(2)-N(3)-N(4)    | 112.4(5)           | N(2)-N(1)-C(1)-C(1)  | 179.9(6)           |
| N(3)-N(4)-C(1)    | 105.2(4)           |                      |                    |

**Table S4** Atomic coordinates of DMA-BTO

| Ato  | Site | x           | y          | z         | Atom | Site | x        | y        | z       |
|------|------|-------------|------------|-----------|------|------|----------|----------|---------|
| m    |      |             |            |           |      |      |          |          |         |
| O(1) | 1    | 0.1287(8)   | 0.2392(6)  | 0.5257(5) | H5A  | 1    | -0.04640 | 0.14980  | 0.66040 |
| N(1) | 1    | 0.2515(9)   | 0.4359(7)  | 0.6031(6) | H5B  | 1    | -0.19210 | -0.01580 | 0.69800 |
| N(2) | 1    | 0.1994(10)  | 0.5650(8)  | 0.7420(7) | H2A  | 1    | 0.21360  | 0.31290  | 0.93280 |
| N(3) | 1    | 0.3593(10)  | 0.7440(8)  | 0.7860(7) | H2B  | 1    | 0.19340  | 0.07740  | 0.88540 |
| N(4) | 1    | 0.514(1)    | 0.7392(8)  | 0.6849(7) | H2C  | 1    | 0.02720  | 0.18270  | 1.00130 |
| N(5) | 1    | -0.1139(9)  | 0.1221(7)  | 0.7426(6) | H3A  | 1    | -0.37820 | 0.20410  | 0.86040 |
| C(1) | 1    | 0.4453(10)  | 0.5443(8)  | 0.5705(7) | H3B  | 1    | -0.44630 | 0.18180  | 0.66110 |
| C(2) | 1    | 0.0981(12)  | 0.1786(9)  | 0.9042(8) | H3C  | 1    | -0.22890 | 0.37680  | 0.81050 |
| C(3) | 1    | -0.3080(12) | 0.2302(10) | 0.7710(9) |      |      |          |          |         |

**Table S5** DTA Parameters of DMA-BTO

| $\beta$ (°C·min <sup>-1</sup> ) | Endothermic peaks |            |            |                                   | Exothermic peaks |            |            |                                   |
|---------------------------------|-------------------|------------|------------|-----------------------------------|------------------|------------|------------|-----------------------------------|
|                                 | $T_0$ (°C)        | $T_p$ (°C) | $T_e$ (°C) | $\Delta H_1$ (kJg <sup>-1</sup> ) | $T_0$ (°C)       | $T_p$ (°C) | $T_e$ (°C) | $\Delta H_1$ (kJg <sup>-1</sup> ) |
| 1                               | 172.62            | 180.42     | 184.86     | -1.12                             | 205.39           | 221.71     | 236.50     | 11.43                             |
| 2                               | 175.54            | 188.80     | 194.91     | -1.17                             | 214.64           | 232.65     | 248.98     | 11.47                             |
| 5                               | 184.91            | 194.55     | 204.54     | -1.21                             | 226.86           | 246.94     | 262.76     | 11.49                             |
| 10                              | 287.56            | 204.40     | 215.44     | -1.35                             | 238.71           | 260.63     | 279.50     | 11.83                             |

**Table S6** Activation energy and pre-exponential factor evaluation by Kissinger method for thermal decomposition of DMA-BTO

| $\beta$ ( $^{\circ}\text{C}\cdot\text{min}^{-1}$ ) | $\log(\beta/T^2)$ | $(1/T)\times 10^3$ | $\ln A$ | Arrhenius parameters     |                         |       |
|----------------------------------------------------|-------------------|--------------------|---------|--------------------------|-------------------------|-------|
|                                                    |                   |                    |         | $E_a(\text{kJmol}^{-1})$ | $A$ ( $\text{s}^{-1}$ ) | $r$   |
| 1                                                  | -12.40            | 2.02               | 26.97   | 122.53                   | $5.17\times 10^{11}$    | 0.999 |
| 2                                                  | -11.75            | 1.97               | 26.97   |                          | $5.19\times 10^{11}$    |       |
| 5                                                  | -10.89            | 1.92               | 27.03   |                          | $5.52\times 10^{11}$    |       |
| 10                                                 | -10.25            | 1.87               | 26.95   |                          | $5.06\times 10^{11}$    |       |

**Table S7** Activation energy and pre-exponential factor evaluation by Ozawa method for thermal decomposition of DMA-BTO

| $\beta$ ( $^{\circ}\text{C}\cdot\text{min}^{-1}$ ) | $\log(\beta)$ | $(1/T)\times 10^{-3}$ | $\ln A$ | Arrhenius parameters     |                         |       |
|----------------------------------------------------|---------------|-----------------------|---------|--------------------------|-------------------------|-------|
|                                                    |               |                       |         | $E_a(\text{kJmol}^{-1})$ | $A$ ( $\text{s}^{-1}$ ) | $r$   |
| 1                                                  | 0             | 2.02                  | 27.50   | 124.65                   | $8.79\times 10^{11}$    | 0.999 |
| 2                                                  | 0.30          | 1.97                  | 27.49   |                          | $8.75\times 10^{11}$    |       |
| 5                                                  | 0.69          | 1.92                  | 27.54   |                          | $9.16\times 10^{11}$    |       |
| 10                                                 | 1.00          | 1.87                  | 27.44   |                          | $8.30\times 10^{11}$    |       |

**Table S8** Calculated thermo-kinetic parameters of DMA-BTO by AKTS

| samples | $E_k/\text{kJ mol}^{-1}$ | $\ln(A_k)/\text{min}^{-1}$ | R     | $E_o/\text{kJ mol}^{-1}$ | R     |
|---------|--------------------------|----------------------------|-------|--------------------------|-------|
| DMA-BTO | 122.53                   | 26.98                      | 0.999 | 124.65                   | 0.999 |

**Table S9** The SADT of DMA-BTO by AKTS

| storage mass/kg          | 1   | 10  | 30  | 50  |
|--------------------------|-----|-----|-----|-----|
| SADT/ $^{\circ}\text{C}$ | 109 | 106 | 104 | 103 |

**Table S10** Second-order perturbation theory analysis of the Fock matrix in NBO basis for DMA-BTO

| Donor NBO      | ED(i)<br>(e) | Acceptor NBO    | ED(i)<br>(e) | $E^{(2)}$<br>( $\text{kJ mol}^{-1}$ ) | $\epsilon_j-\epsilon_i$<br>(a.u.) | $F(i,j)$<br>(a.u.) |
|----------------|--------------|-----------------|--------------|---------------------------------------|-----------------------------------|--------------------|
| BD N(2)-N(3)   | 1.98735      | BD* C(6)-C(34)  | 0.02956      | 3.59                                  | 1.33                              | 0.062              |
| BD N(3)-N(4)   | 1.98635      | BD* O(1)-N(2)   | 0.02416      | 4.24                                  | 1.24                              | 0.065              |
| BD N(4)-N(5)   | 1.98257      | BD* C(6)-C(34)  | 0.02956      | 5.08                                  | 1.31                              | 0.073              |
|                |              | BD* O(1)-N(2)   | 0.02416      | 4.54                                  | 1.18                              | 0.066              |
| BD N(5)-C(6)   | 1.81802      | BD* N(3)-N(4)   | 0.02183      | 23.45                                 | 0.29                              | 0.080              |
|                |              | BD* N(33)-C(34) | 0.53774      | 7.30                                  | 0.31                              | 0.047              |
| BD N(31)-N(32) | 1.87991      | BD* N(33)-C(34) | 0.53774      | 11.66                                 | 0.33                              | 0.062              |
| BD N(33)-C(34) | 1.98283      | BD* O(29)-N(30) | 0.02417      | 4.54                                  | 1.18                              | 0.066              |

|                 |         |                 |         |       |      |       |
|-----------------|---------|-----------------|---------|-------|------|-------|
| LP N(2)         | 1.41331 | BD* N(3)-N(4)   | 0.02183 | 42.76 | 0.24 | 0.094 |
|                 |         | BD* N(5)-C(6)   | 0.03284 | 58.39 | 0.26 | 0.111 |
| BD* N(7)-H(9)   | 0.14140 | BD* O(1)-N(2)   | 0.02416 | 5.69  | 0.03 | 0.040 |
| BD* N(18)-H(20) | 0.14125 | BD* O(29)-N(30) | 0.02417 | 5.71  | 0.03 | 0.040 |

**Table S11** Mulliken charge population of atoms in DMA-BTO

| Atom | Mulliken charge (e) | Natural charge (e) |
|------|---------------------|--------------------|
| O1   | -0.493              | -0.628             |
| N2   | -0.100              | 0.171              |
| N3   | -0.046              | -0.093             |
| N4   | -0.105              | -0.086             |
| N5   | -0.408              | -0.409             |
| C6   | 0.446               | 0.247              |
| N7   | -0.359              | -0.606             |
| C10  | -0.195              | -0.353             |
| C14  | -0.193              | -0.354             |
| H8   | 0.289               | -0.461             |
| H9   | 0.326               | 0.451              |
| H11  | 0.133               | 0.191              |
| H12  | 0.155               | 0.217              |
| H13  | 0.136               | 0.195              |
| H15  | 0.139               | 0.197              |
| H16  | 0.144               | 0.208              |
| H17  | 0.132               | 0.191              |
